# Supplementary material for: Oxidation and temperature dual responsive polymers based on phenylboronic acid and N-isopropylacrylamide motifs
Source: Royal Society of Chemistry journal article supplement (doi:10.1039/c5py01999k), 2016-01-01
Supplement: c5py01999k1.pdf [file c5py01999k1.pdf]

*Supplementary Information*

## Oxidation and temperature dual responsive polymers based on phenylboronic acid and *N*-isopropylacrylamide motifs

Mei Zhang,<sup>a</sup> Cheng-Cheng Song,<sup>a</sup> Ran Ji,<sup>a</sup> Zeng-Ying Qiao,<sup>b</sup> Chao Yang,<sup>b</sup> Fang-Yi Qiu,<sup>a</sup> De-Hai Liang,<sup>a</sup> Fu-Sheng Du,<sup>\*a</sup> Zi-Chen Li<sup>\*a</sup>

<sup>a</sup> Beijing National Laboratory for Molecular Sciences, Key Laboratory of Polymer Chemistry and Physics of Ministry of Education, Center for soft Matter Science and Engineering, College of Chemistry & Molecular Engineering, Peking University, Beijing 100871, China.

<sup>b</sup> CAS Key Laboratory for Biological Effects of Nanomaterials and Nanosafety, National Center for Nanoscience and Technology, Beijing 100190, China.

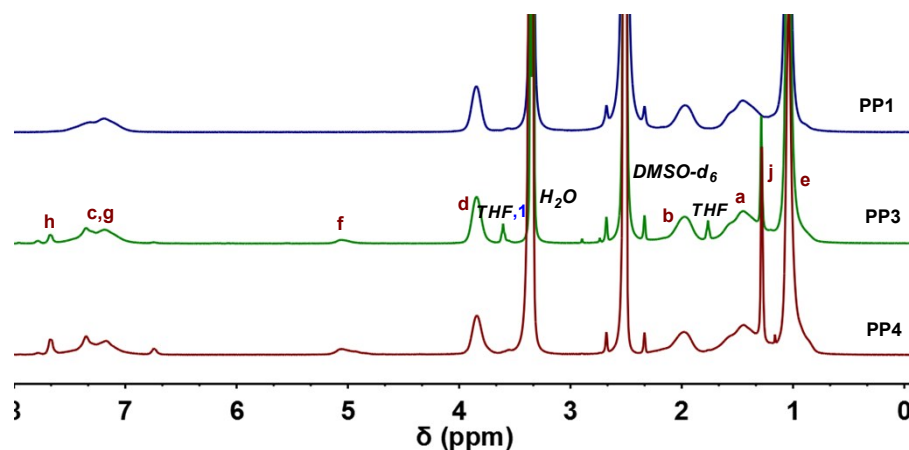

**Fig. S1** <sup>1</sup>H NMR spectra of PP1, PP3 and PP4 in DMSO-*d*<sub>6</sub>. Molar ratio of M1 to M2 in copolymers PP1 to PP4 is calculated by comparing the integration intensities of peak d (~3.8 ppm) to peak f (~5.0 ppm).

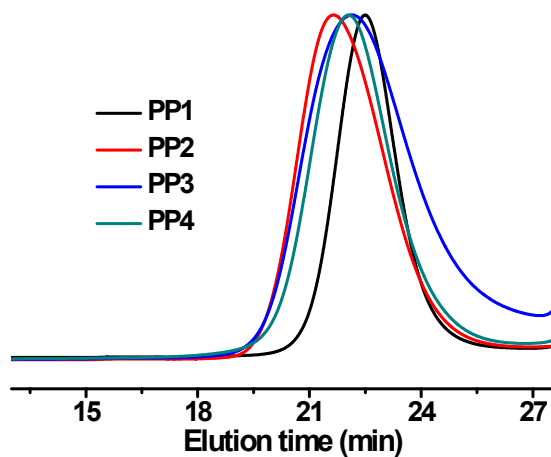

Fig. S2 GPC curves of PP1–PP4 with THF as the eluent.

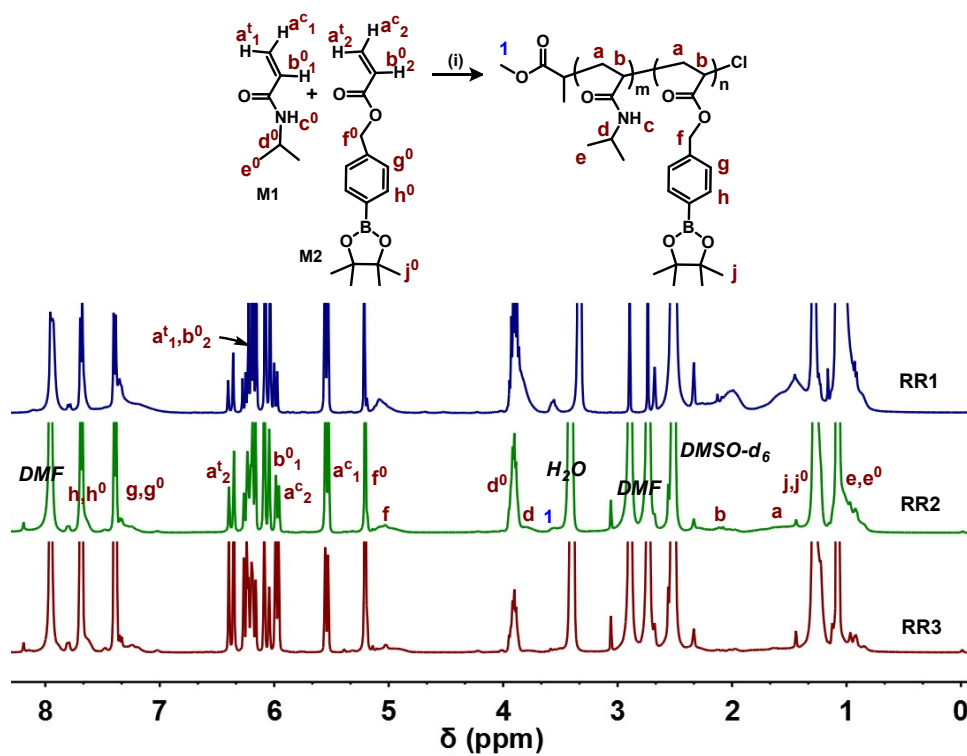

Fig. S3 *In situ*  $^1\text{H}$  NMR spectra of polymerization mixture in  $\text{DMSO-}d_6$ . (i) MCP, CuCl,  $\text{Me}_6\text{TREN}$ , DMF,  $60\text{ }^\circ\text{C}$ , 24 h.

$$\text{Formula: } \log \frac{c(M_1)}{c(M_1)_0} = \frac{r_1}{1-r_1} \log \frac{c(M_1)_0 c(M_2)}{c(M_2)_0 c(M_1)} - \frac{1-r_1 r_2}{(1-r_1)(1-r_2)} \log \frac{(r_2-1) \frac{c(M_2)}{c(M_1)} - r_1 + 1}{(r_2-1) \frac{c(M_2)_0}{c(M_1)_0} - r_1 + 1}$$

**Table S1.** Estimation of the Reactivity Ratios of Monomers <sup>a</sup>

| Run | M1/M2<br>in feed ratio | Conversion(%) <sup>b</sup> |      |
|-----|------------------------|----------------------------|------|
|     |                        | M1                         | M2   |
| RR1 | 90/10                  | 39.0                       | 43.0 |
| RR2 | 70/30                  | 14.3                       | 18.5 |
| RR3 | 50/50                  | 15.0                       | 14.0 |

<sup>a</sup> Reactions were performed in DMF at 60 °C,  $[M]_0 = 40$  wt %,  $[M]:[MCP]:[CuCl]:[Me_6TREN] = 100:0.5:1:1$ . <sup>b</sup> Their conversion was calculated by the formula:  $\alpha_{M1} = (I_{d+d0} - I_{a^c1})/I_{d+d0} \times 100\%$ ,  $\alpha_{M2} = (I_{f+f0} - 2I_{a^c2})/I_{f+f0} \times 100\%$ , respectively.

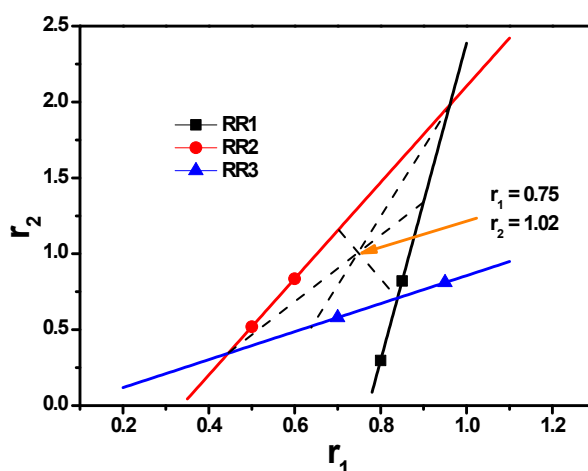**Fig. S4** Monomer reactivity ratios estimated by Mayo-Lewis method.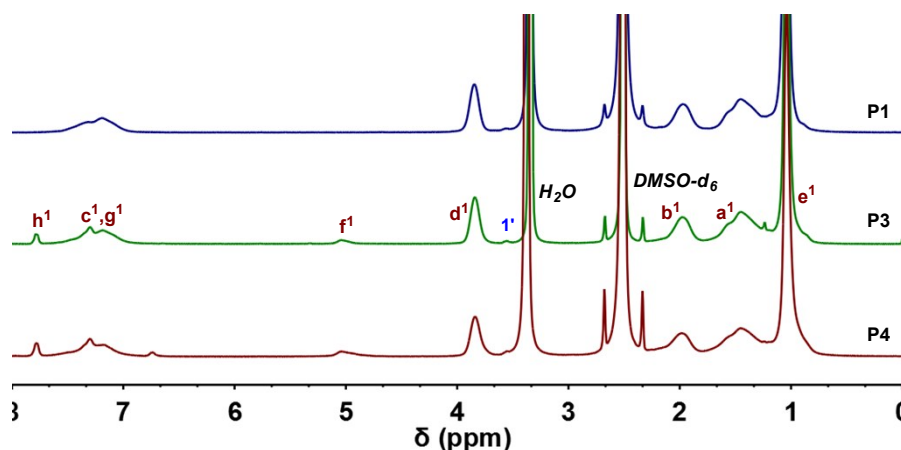

**Fig. S5** <sup>1</sup>H NMR spectra of **P1**, **P3** and **P4** (without pinacol ester) in DMSO-*d*<sub>6</sub>. Molar ratio of **M1** to **M2** in copolymers **P1** to **P4** is calculated by comparing the integration intensities of peak **d**<sup>1</sup> (~3.8 ppm) to peak **f**<sup>1</sup> (~5.0 ppm). Their DP was calculated by the formula:  $DP = (6I_{d^1} + 3I_{f^1})/(2I_{1'})$ , where  $I_{d^1}$ ,  $I_{f^1}$  and  $I_{1'}$  denote the integration intensity of peak **d**<sup>1</sup> (~3.8 ppm), peak **f**<sup>1</sup> (~5.0 ppm) and peak **1**<sup>'</sup> (~3.6 ppm), respectively.

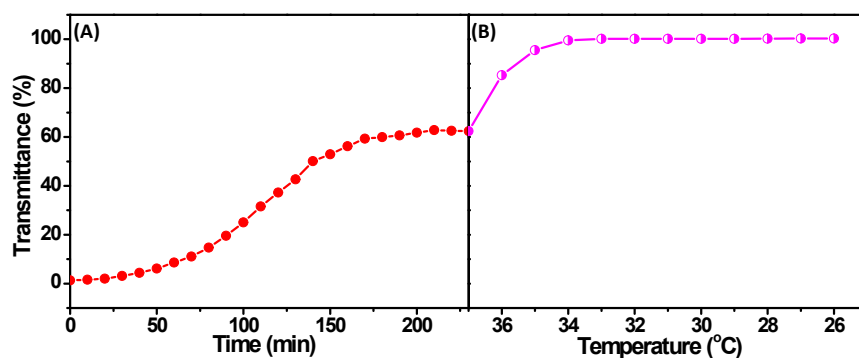

**Fig. S6** (A) Plots of transmittance vs oxidation time of copolymer **P2** (1.0 mg/mL) in 50 mM PB solution (pH 7.4) with  $\text{H}_2\text{O}_2$  (10 mM) at 37 °C. (B) Plots of transmittance vs temperature for the completely decomposed **P2** in the same buffer solution.

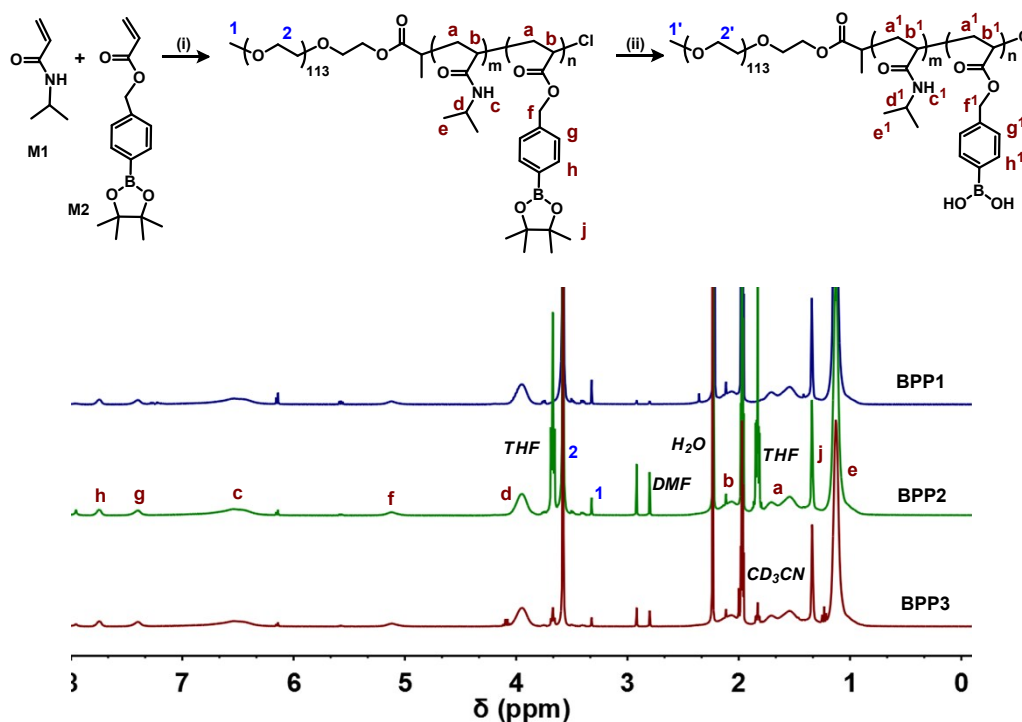

**Fig. S7**  $^1\text{H}$  NMR spectra of **BPP1–BPP3** (with pinacol ester) in  $\text{CD}_3\text{CN}$ . Molar ratio of **M1** to **M2** in copolymers **BPP1** to **BPP4** is calculated by comparing the integration intensities of peak d (~3.9 ppm) to peak f (~5.1 ppm).

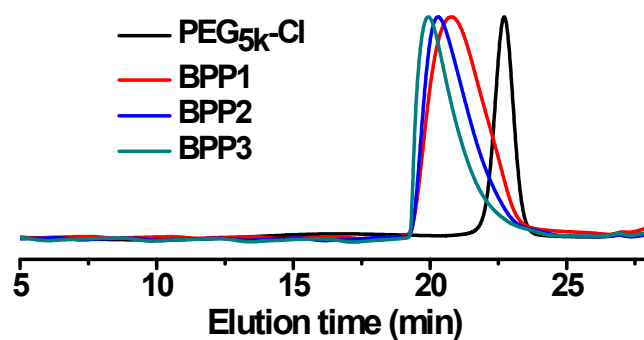

Fig. S8 GPC curves of BPP1–BPP3 (with pinacol ester) and mPEG<sub>113</sub>-Cl.

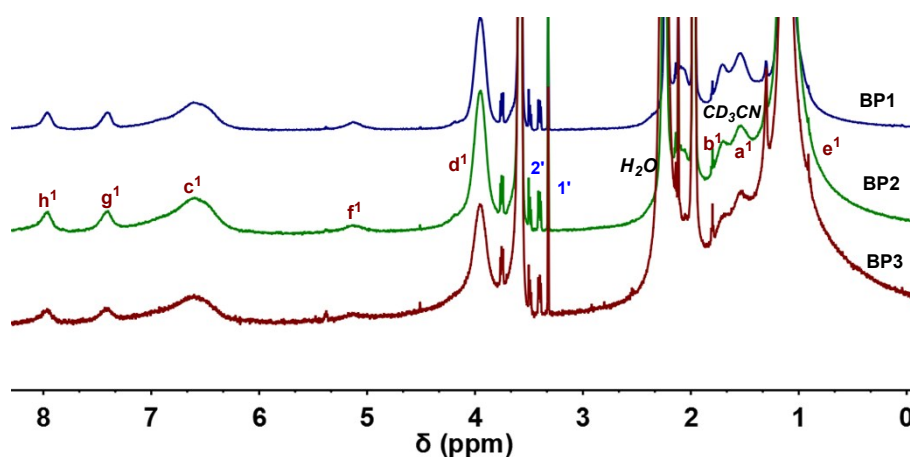

Fig. S9 <sup>1</sup>H NMR spectra of BP1–BP3 (without pinacol ester) in CD<sub>3</sub>CN. Molar ratio of M1 to M2 in copolymers BP1 to BP4 is calculated by comparing the integration intensities of peak d<sup>1</sup> (~3.9 ppm) to peak f<sup>1</sup> (~5.1 ppm). Their DP was calculated by the formula:  $DP = (6I_{d^1} + 3I_{f^1}) / (2I_{1'})$ , where  $I_{d^1}$ ,  $I_{f^1}$  and  $I_{1'}$  denote the integration intensity of peak d<sup>1</sup> (~3.9 ppm), peak f<sup>1</sup> (~5.1 ppm) and peak 1' (~3.3 ppm), respectively.

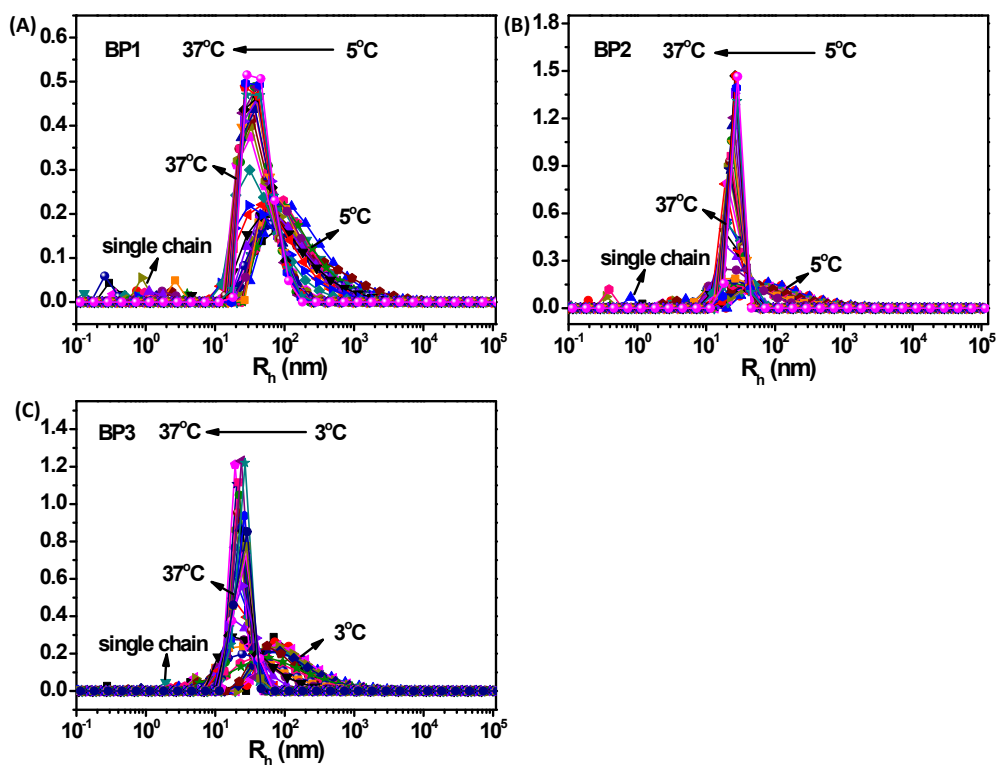

**Fig. S10** CONTIN analyses of **BP1–BP3** nanoparticles (0.1 mg/mL) in 50 mM PB solution (pH 7.4) at various temperatures with the slow heating procedure. Detection angle: 90°.

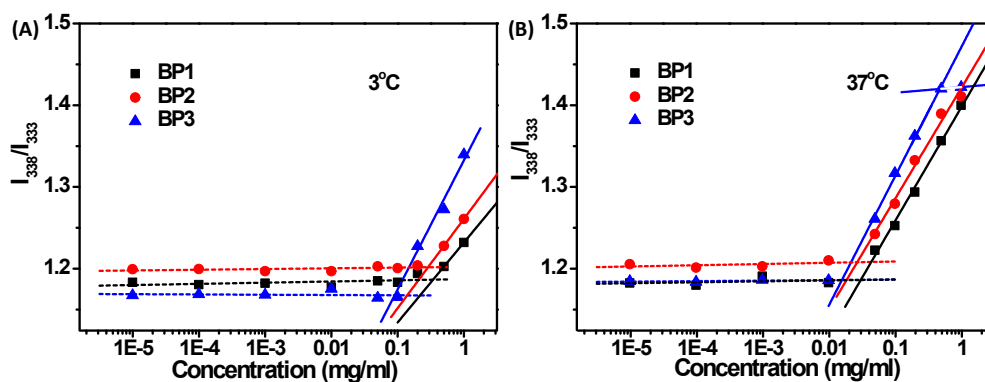

**Fig. S11** Relationship between  $I_{338}/I_{333}$  ratio of pyrene and the concentration of **BP** copolymers at (A) 3 °C and (B) 37 °C. Pyrene was dissolved (or dispersed) in **BP1–BP3** aqueous solution with the concentration of  $1.0 \times 10^{-6}$  mM.

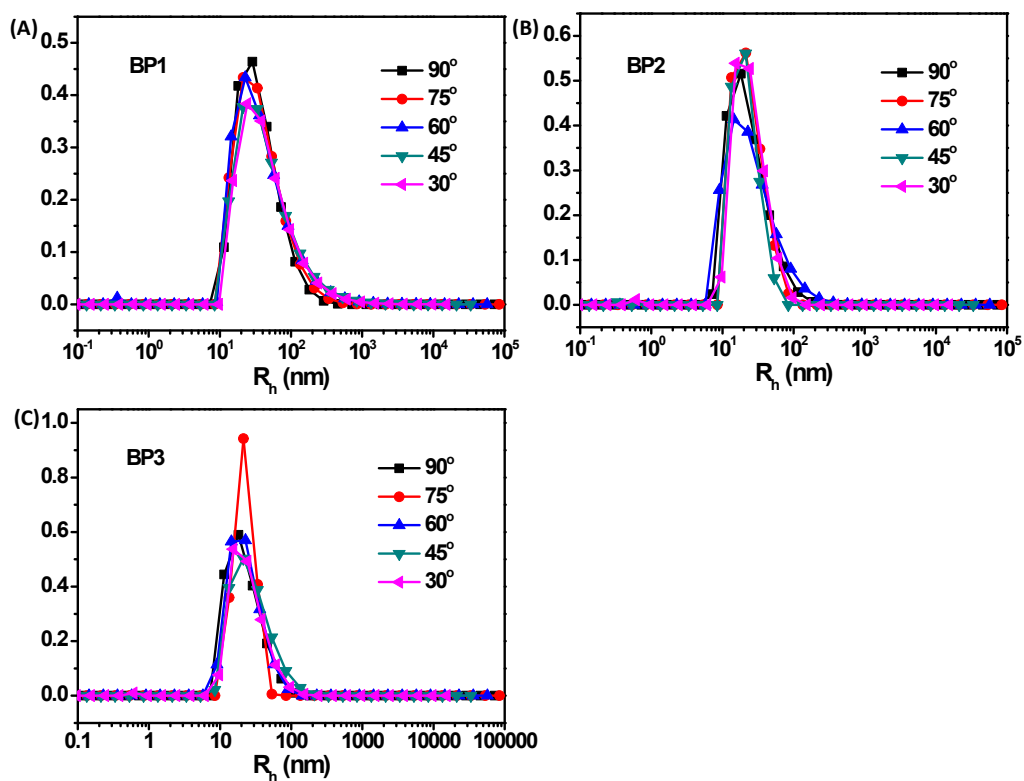

**Fig. S12** Size distribution of BP1–BP3 nanoparticles (0.1 mg/mL) in 50 mM PB solution (pH 7.4) at 37 °C. The nanoparticles were prepared by the fast heating process.

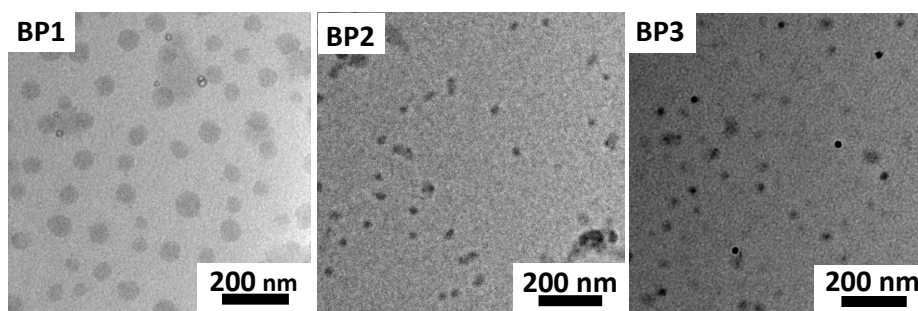

**Fig. S13** TEM photographs of BP1–BP3 nanoparticles (0.1 mg/mL) formed in 50 mM PB solution (pH 7.4) at 37 °C.

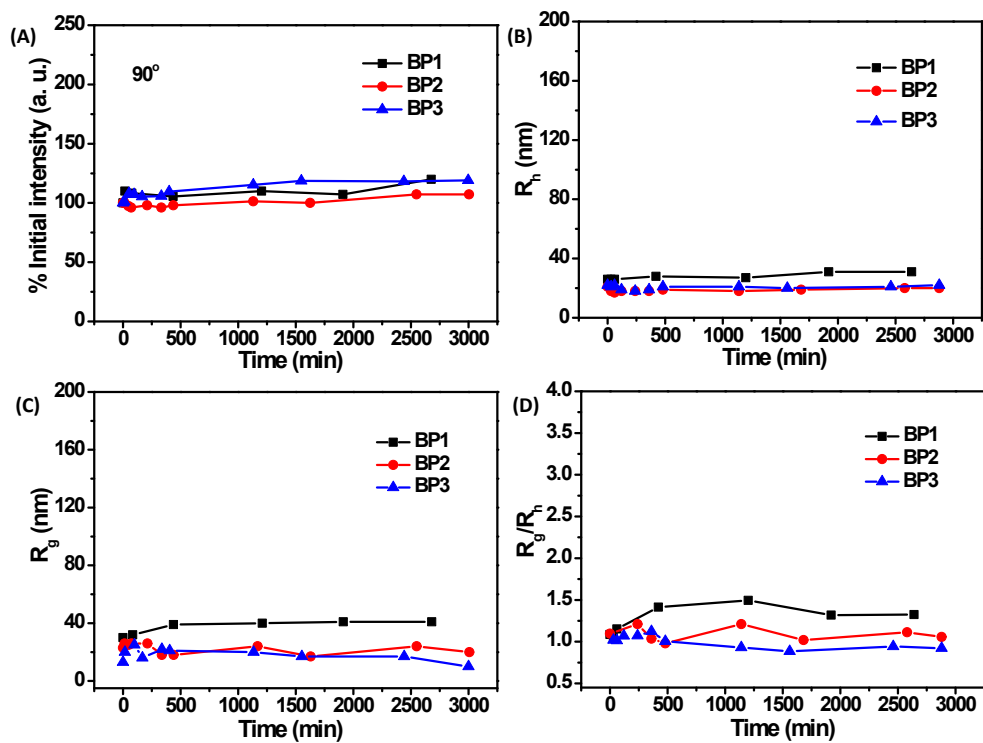

**Fig. S14** (A) excess scattered intensity, (B)  $R_h$ , (C)  $R_g$ , and (D)  $R_g/R_h$  of **BP1–BP3** nanoparticles (0.1 mg/mL) in 50 mM PB solution (pH 7.4) incubated for different times at 37 °C, without H<sub>2</sub>O<sub>2</sub>.



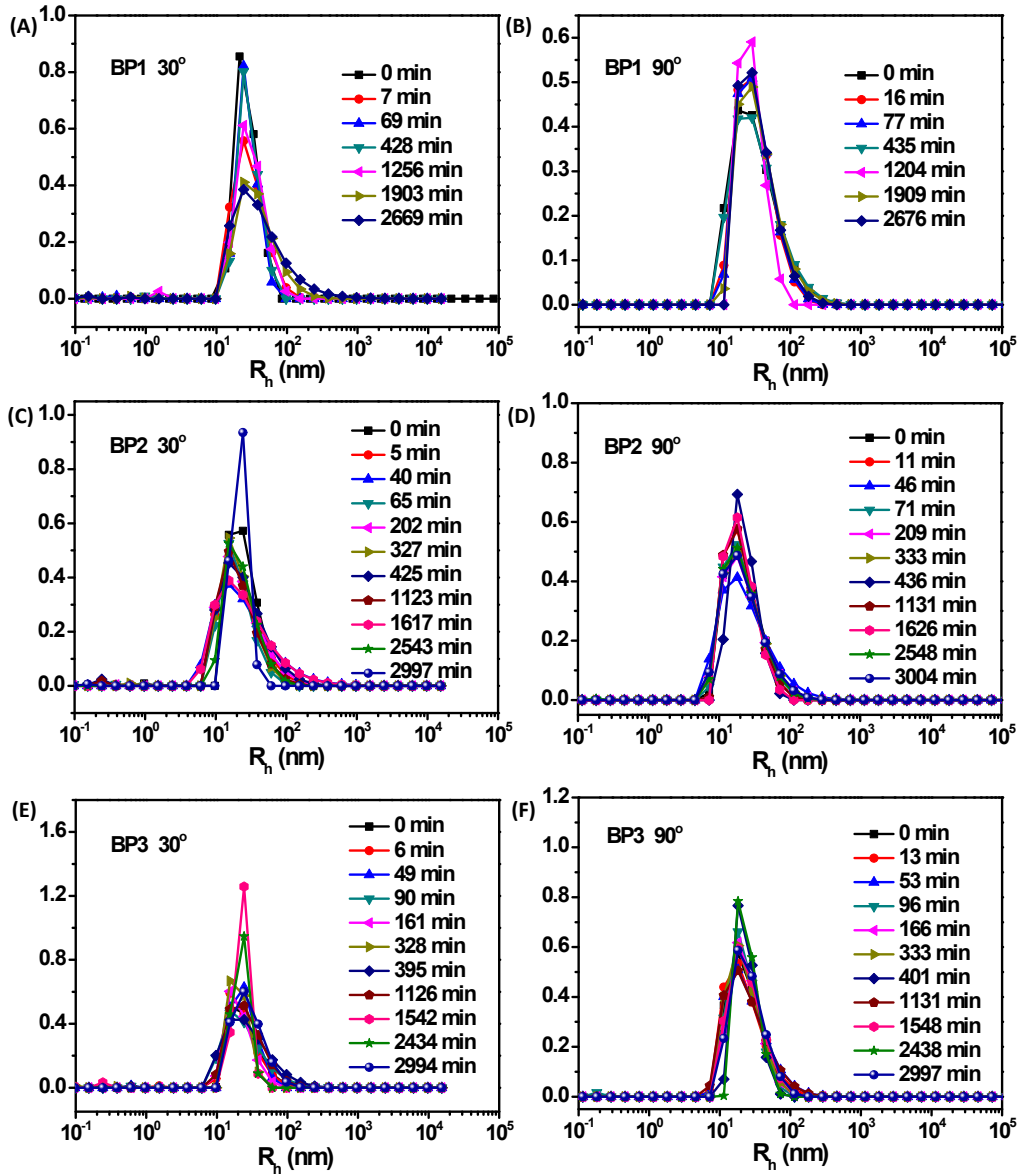

**Fig. S15** CONTIN analyses of **BP1–BP3** (0.1 mg/mL) nanoparticles in 50 mM PB solution (pH 7.4) incubated for different times at 37 °C, without H<sub>2</sub>O<sub>2</sub>. Detection angle: 30° and 90°.

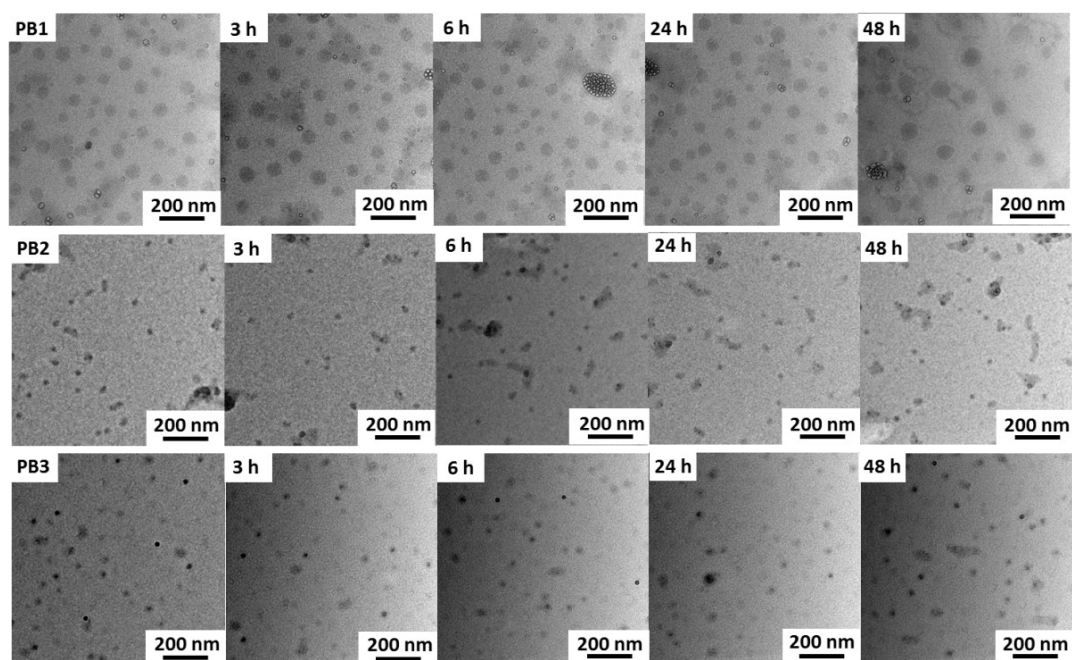

**Fig. S16.** TEM photographs of **BP1–BP3** nanoparticles (0.1 mg/mL) formed in 50 mM PB solution (pH 7.4) and incubated for various times at 37 °C, without H<sub>2</sub>O<sub>2</sub>.

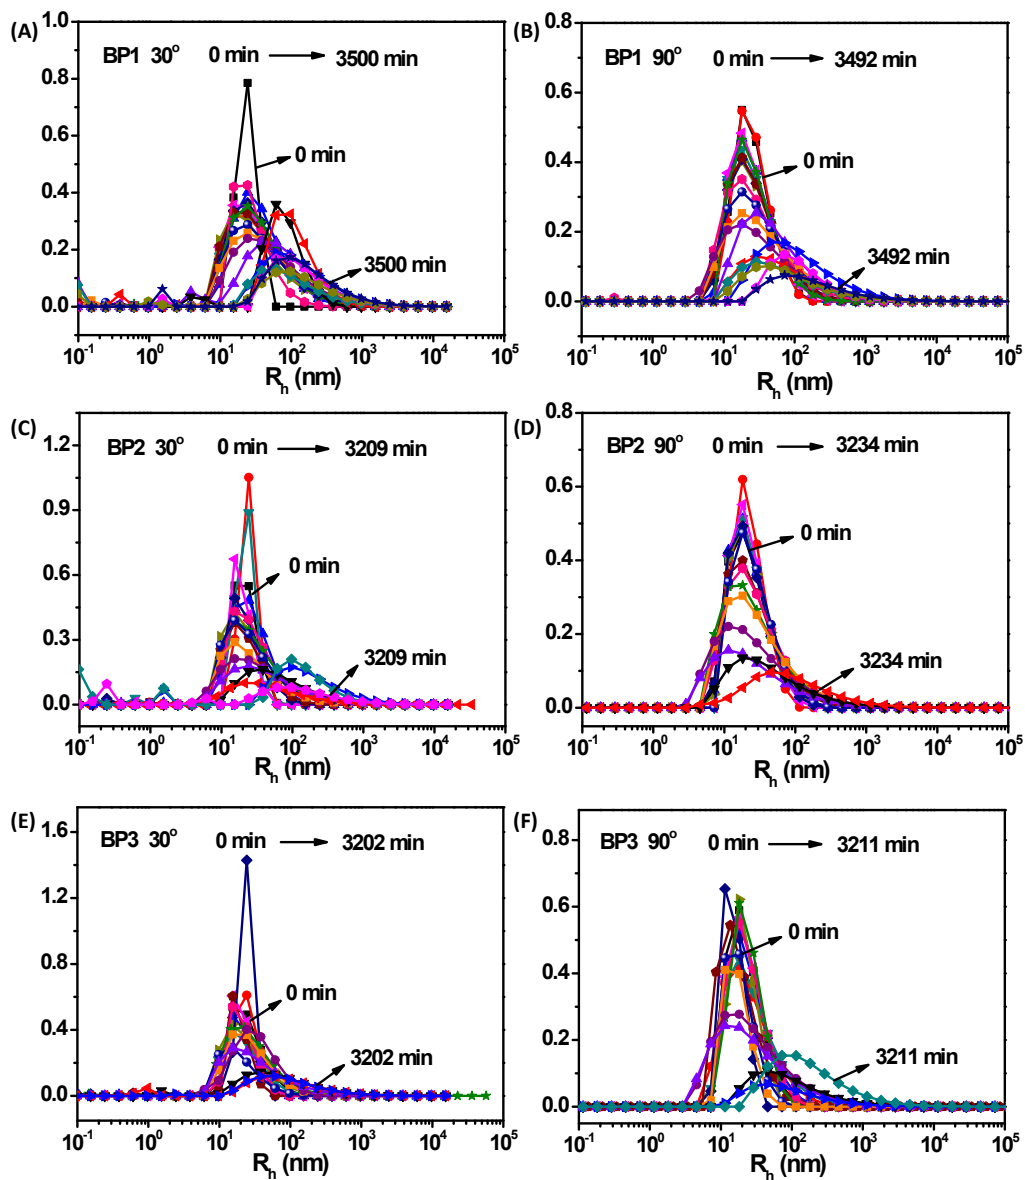

**Fig. S17** CONTIN analyses of **BP1–BP3** (0.1 mg/mL) nanoparticles in 50 mM PB solution (pH 7.4) incubated for different times at 37 °C, with 0.5 mM H<sub>2</sub>O<sub>2</sub> at 37 °C. Detection angle: 30° and 90°.

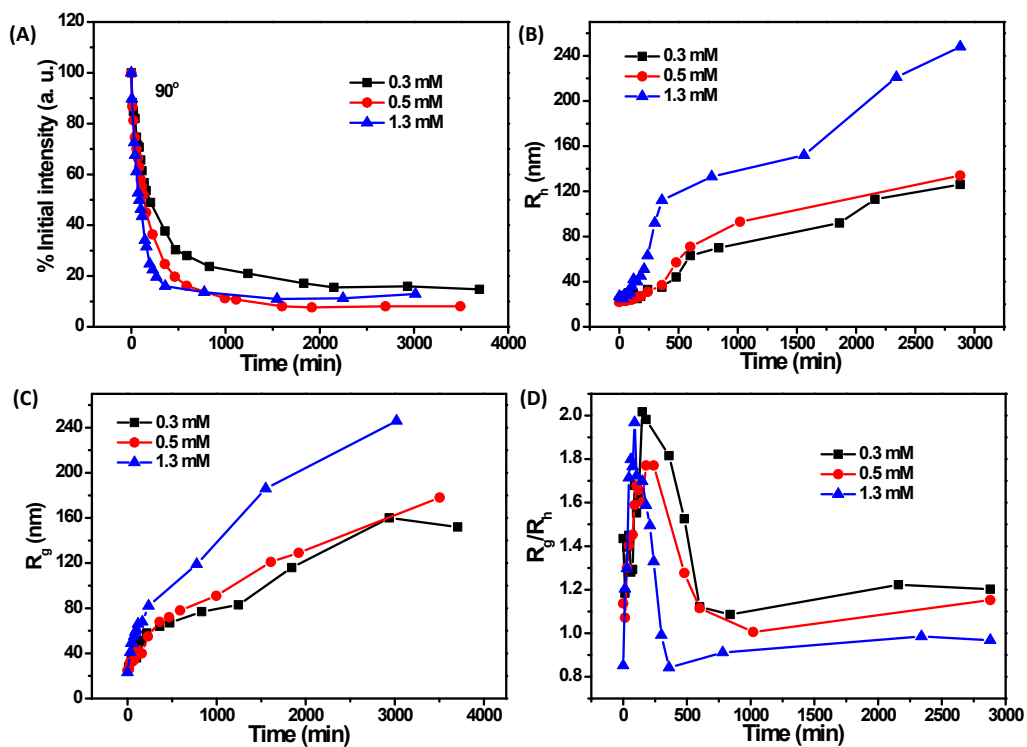

**Fig. S18** (A) excess scattered intensity, (B)  $R_h$ , (C)  $R_g$ , and (D)  $R_g/R_h$  of **BPI** nanoparticles (0.1 mg/mL) in PB solution (50 mM, pH 7.4) incubated for different times at 37 °C, with different concentrations of H<sub>2</sub>O<sub>2</sub>, 37 °C.

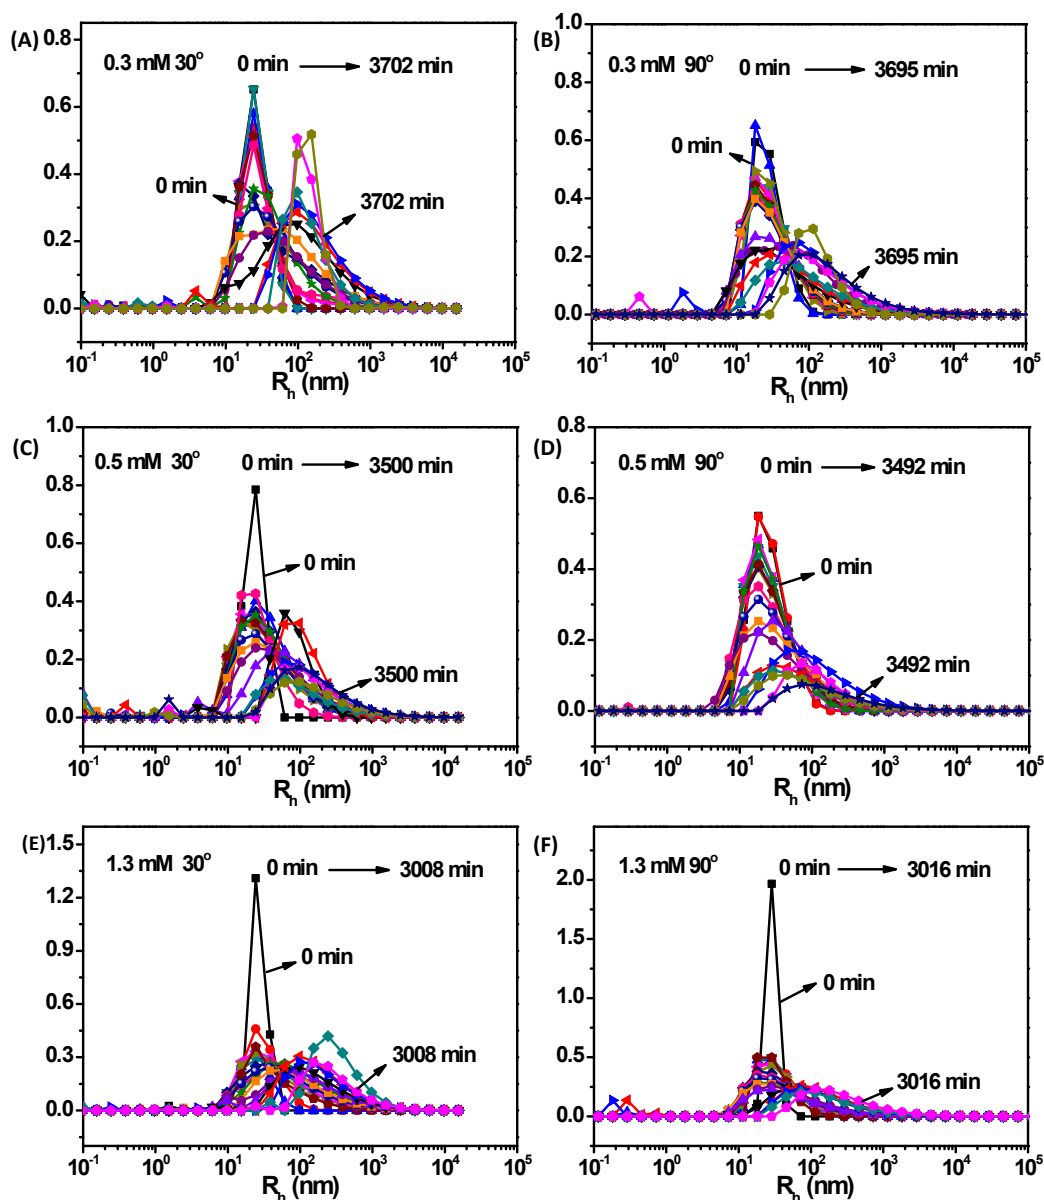

**Fig. S19** CONTIN analyses of of **BPI** nanoparticles (0.1 mg/mL) in PB solution (50 mM, pH 7.4) incubated for different times at 37 °C, with different concentrations of H<sub>2</sub>O<sub>2</sub>, 37 °C. Detection angle: 30° and 90°.

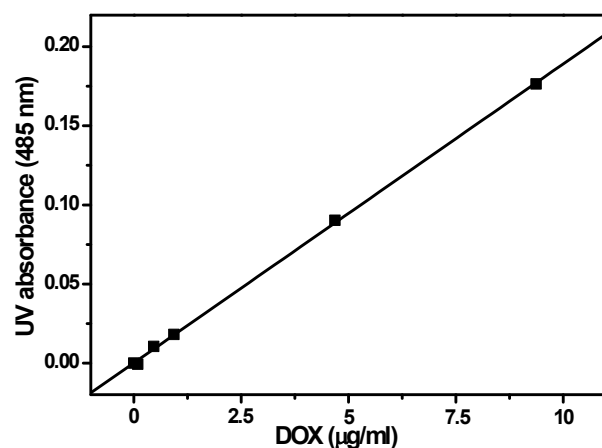

**Fig. S20** The calibration curve of DOX in 10 mM PB solution (pH 7.4).

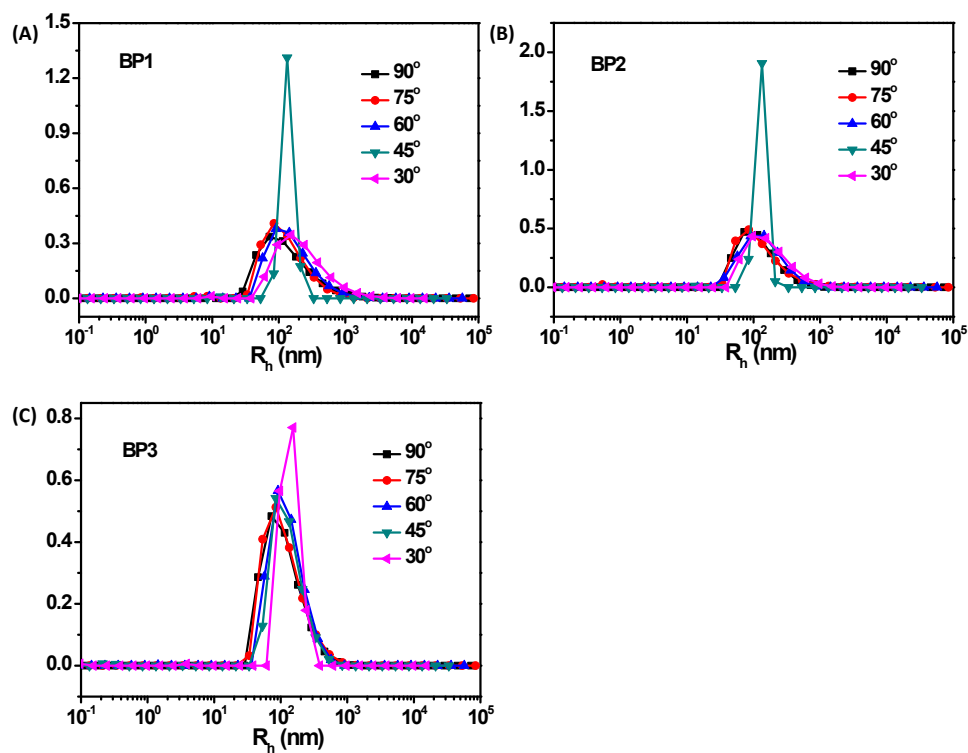

**Fig. S21** Size distribution of the DOX-loaded **BP1–BP3** nanoparticles (0.1 mg/mL) in 10 mM PB solution (pH 7.4) at 37 °C.

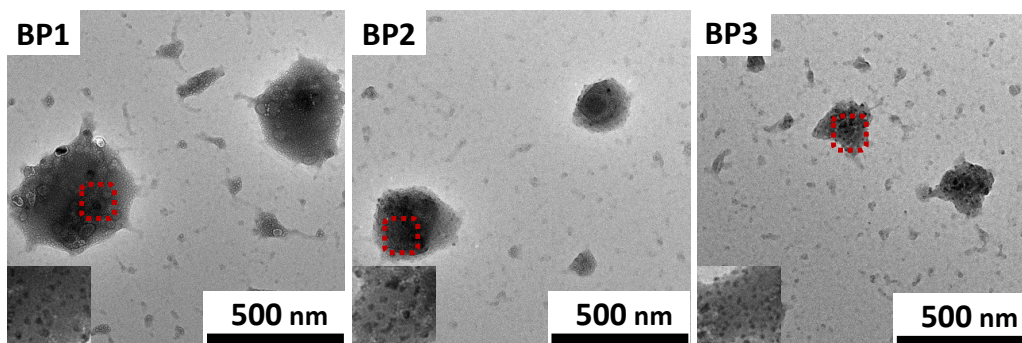

**Fig. S22** TEM photographs of the DOX-loaded **BP1–BP3** nanoparticles (0.1 mg/mL) formed in 50 mM PB solution (pH 7.4) at 37 °C.

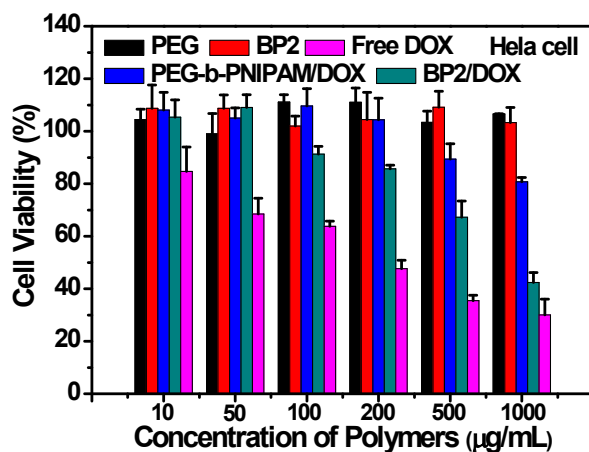

**Fig. S23** Cell viability of HeLa cells measured by CCK-8 assay at 37 °C. The DOX-loading contents of the drug-loaded **BP2** and PEG-*b*-PNIPAM nanoparticles were 3.0 wt% and 3.3 wt%, respectively. The concentrations of DOX are 0.3, 1.5, 3.0, 6.0, 15 and 30 µg/mL, respectively.
